# Supplementary material for: Epigenetic Regulation of Thyroid Hormone Receptor Beta in Renal Cancer
Source: PubMed Central journal article supplement (PMC4029725; doi:10.1371/journal.pone.0097624), 2014-05-21

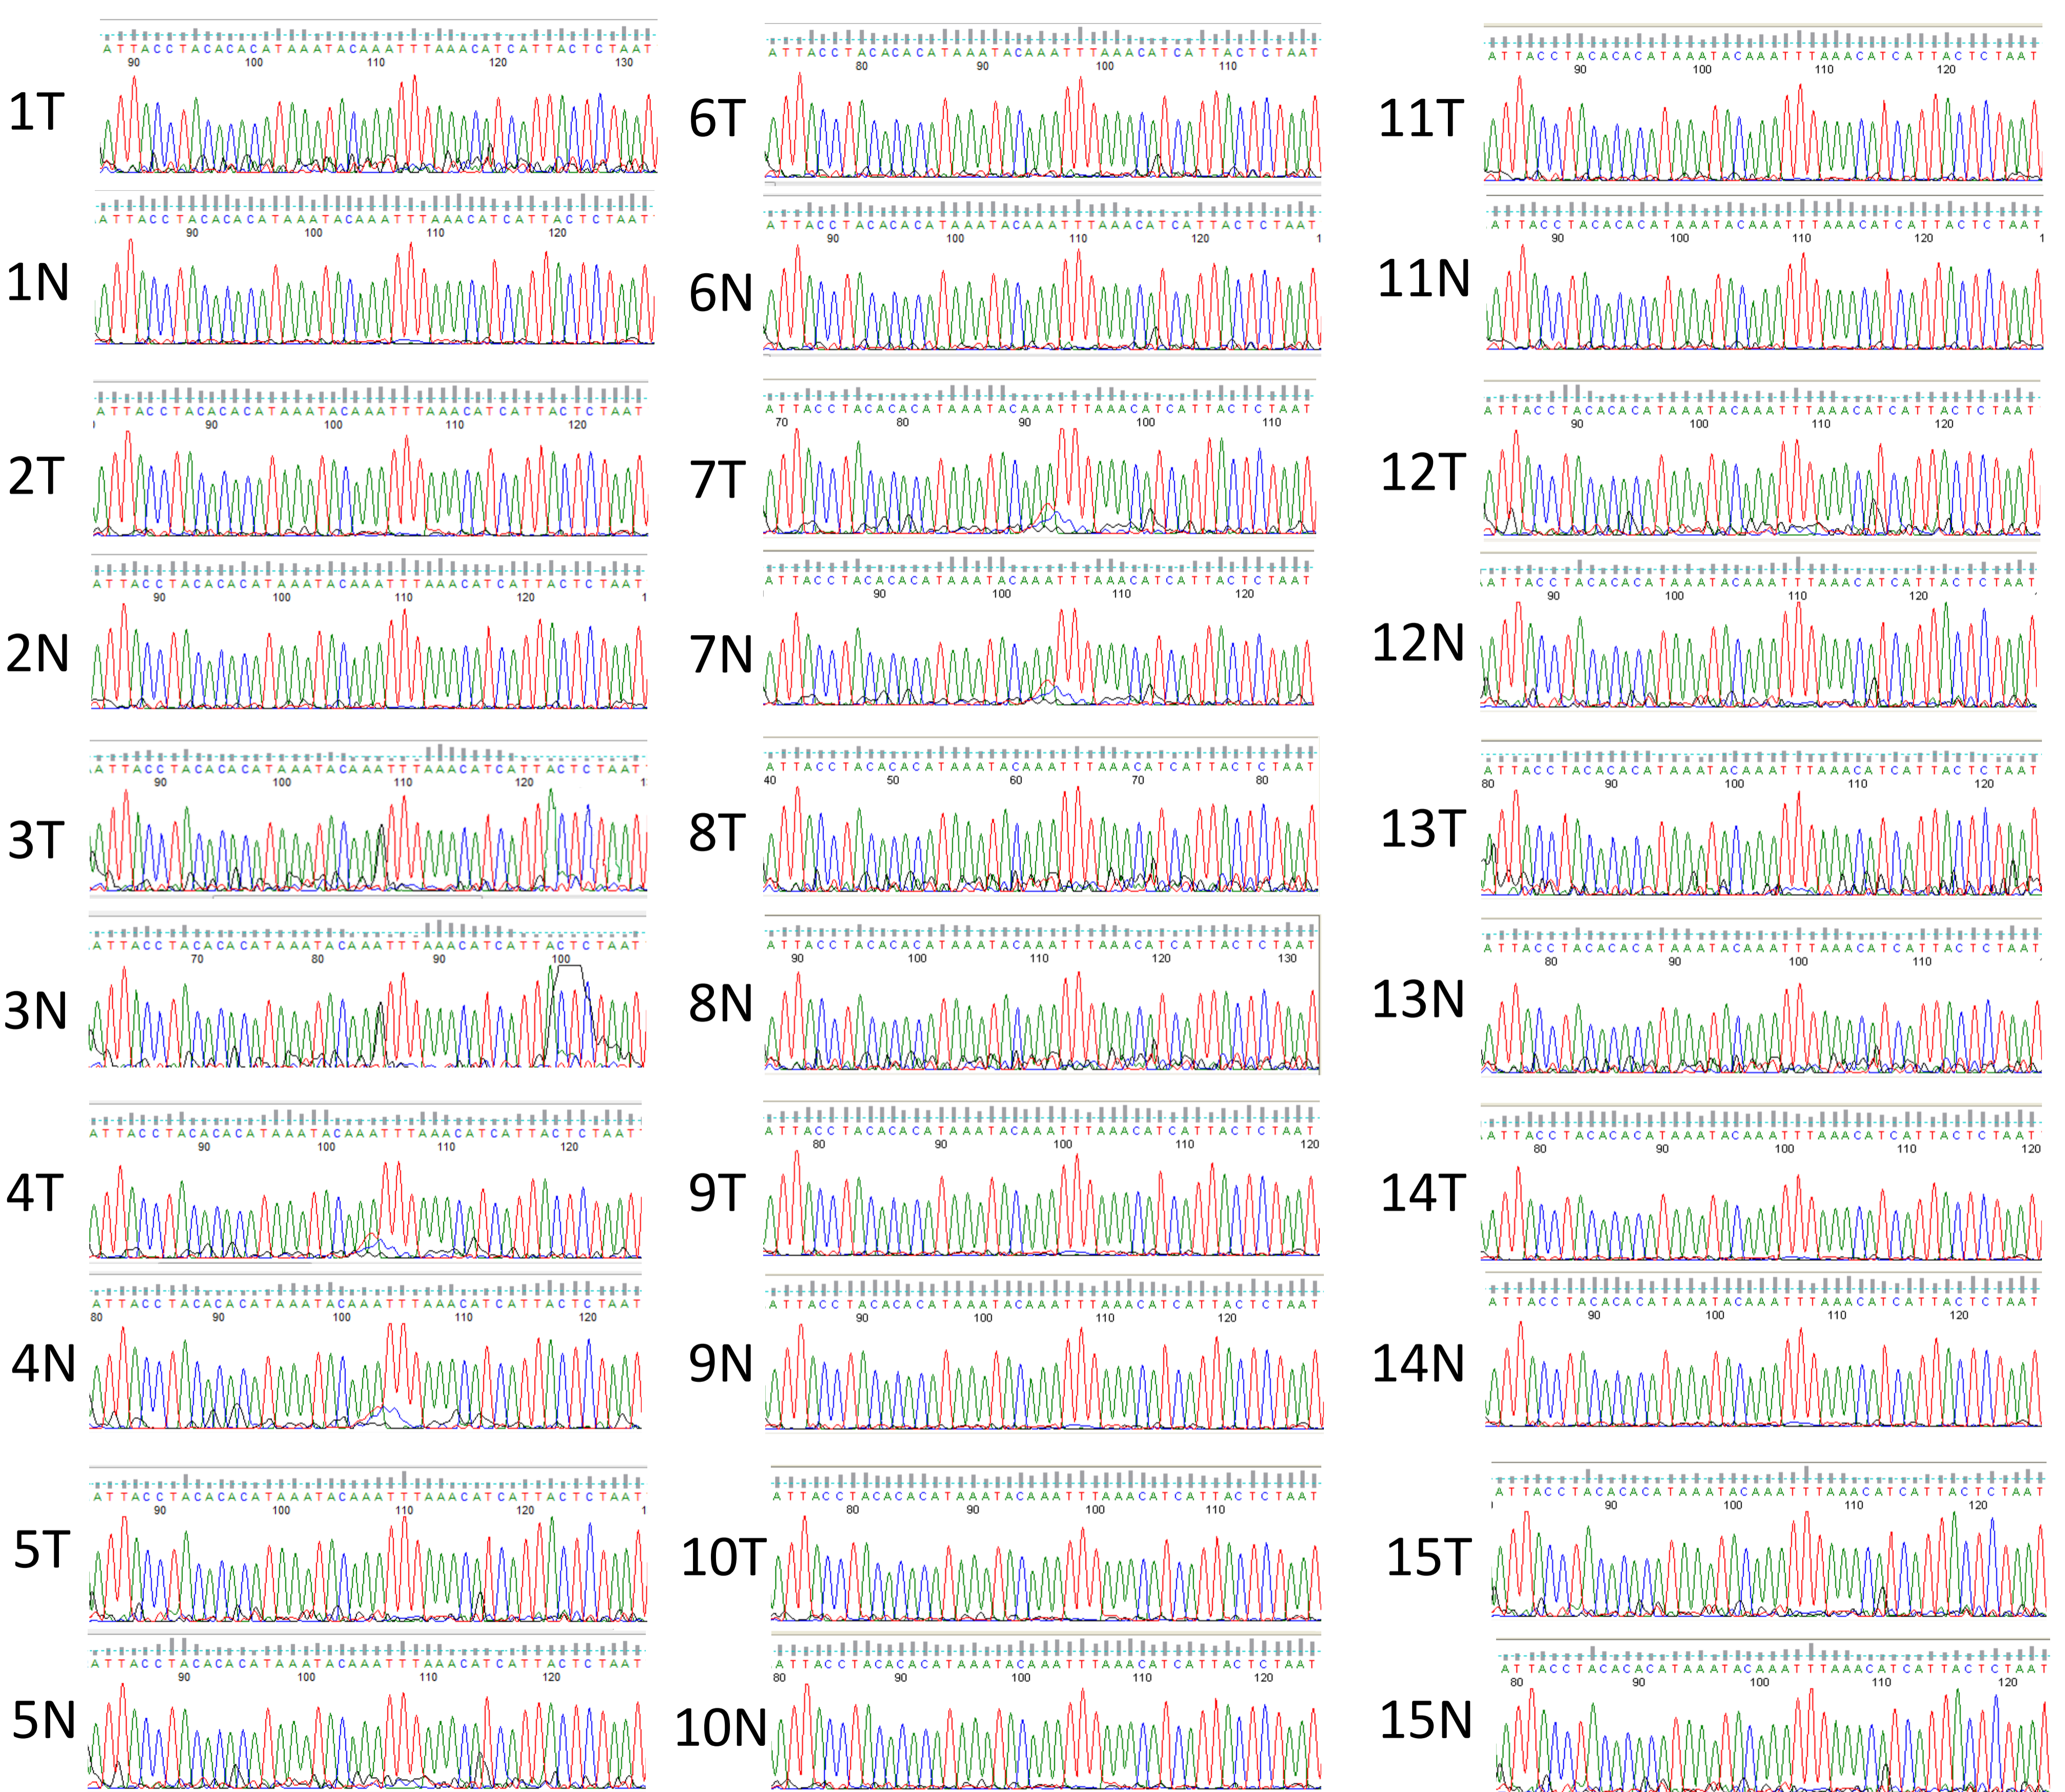

Supplement: pone.0097624.s002.pdf [file pone.0097624.s002.pdf]
